# Supplementary material for: Studies of a bola-type bis(dithiafulvene) molecular system: synthesis, crystal structure, and electrochemical properties
Source: Royal Society of Chemistry journal article supplement (doi:10.1039/d2nj01796b), 2022-01-01
Supplement: d2nj01796b1.pdf [file d2nj01796b1.pdf]

*Electronic Supplementary Information for*

## **Studies of a bola-type bis(dithiafulvene) system: synthesis crystal structure, and electrochemical properties**

Azadeh Afzali,<sup>a</sup> Zahra A. Tabasi,<sup>a</sup> Baiyu H. Zhang,<sup>b</sup> and Yuming Zhao<sup>\*a</sup>

<sup>a</sup>Department of Chemistry, Memorial University of Newfoundland, St.  
John's, NL, Canada A1B 3X7

<sup>b</sup>Northern Region Persistent Organic Pollutant Control (NRPOP)  
Laboratory, Faculty of Engineering and Applied Science, Memorial  
University of Newfoundland, St. John's, NL, Canada A1B 3X5

Email: [yuming@mun.ca](mailto:yuming@mun.ca)

### **Table of Contents**

|                                                                                                          |     |
|----------------------------------------------------------------------------------------------------------|-----|
| 1. NMR, IR and Mass Spectra for Compounds <b>5</b> and <b>6</b>                                          | S2  |
| 2. Crystallographic Data for Compounds <b>5</b> and <b>6</b>                                             | S8  |
| 3. CV Titration Results of Poly-[ <b>5</b> ]/poly-[ <b>7</b> ] film                                      | S10 |
| 4. CV Titration Results of poly-[ <b>7</b> ] Film with Cannabidiol,<br>Phenol, and Catechol              | S12 |
| 5. Effects of Trace Amounts of Water on the CV Properties of<br>Poly-[ <b>5</b> ]/Poly-[ <b>7</b> ] Film | S15 |
| 6. Understanding the Adsorption of Phenols on Poly-[ <b>5</b> ]/Poly-[ <b>7</b> ] Film                   | S16 |
| 7. Results of DFT and TD-DFT Calculations                                                                | S17 |

1. NMR, IR and Mass Spectra for Compounds **5** and **6**

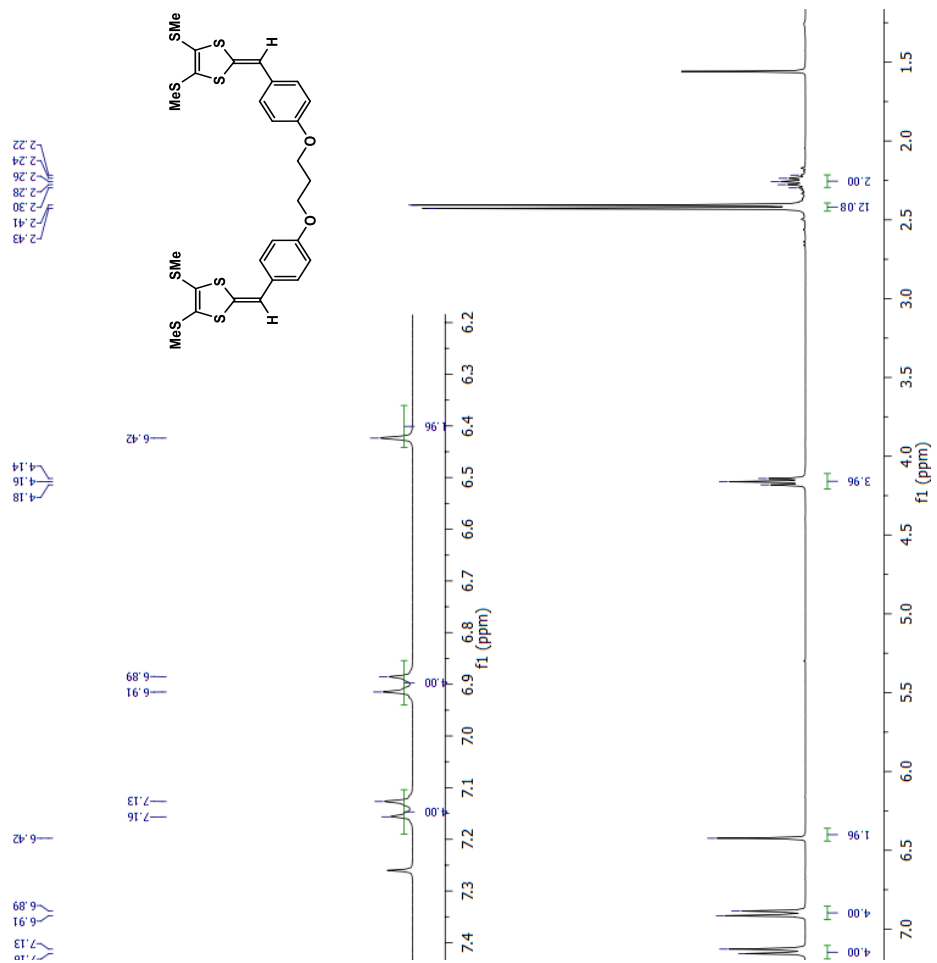

**Fig. S-1**  $^1\text{H}$  NMR (300 MHz,  $\text{CDCl}_3$ ) of compound **5**.

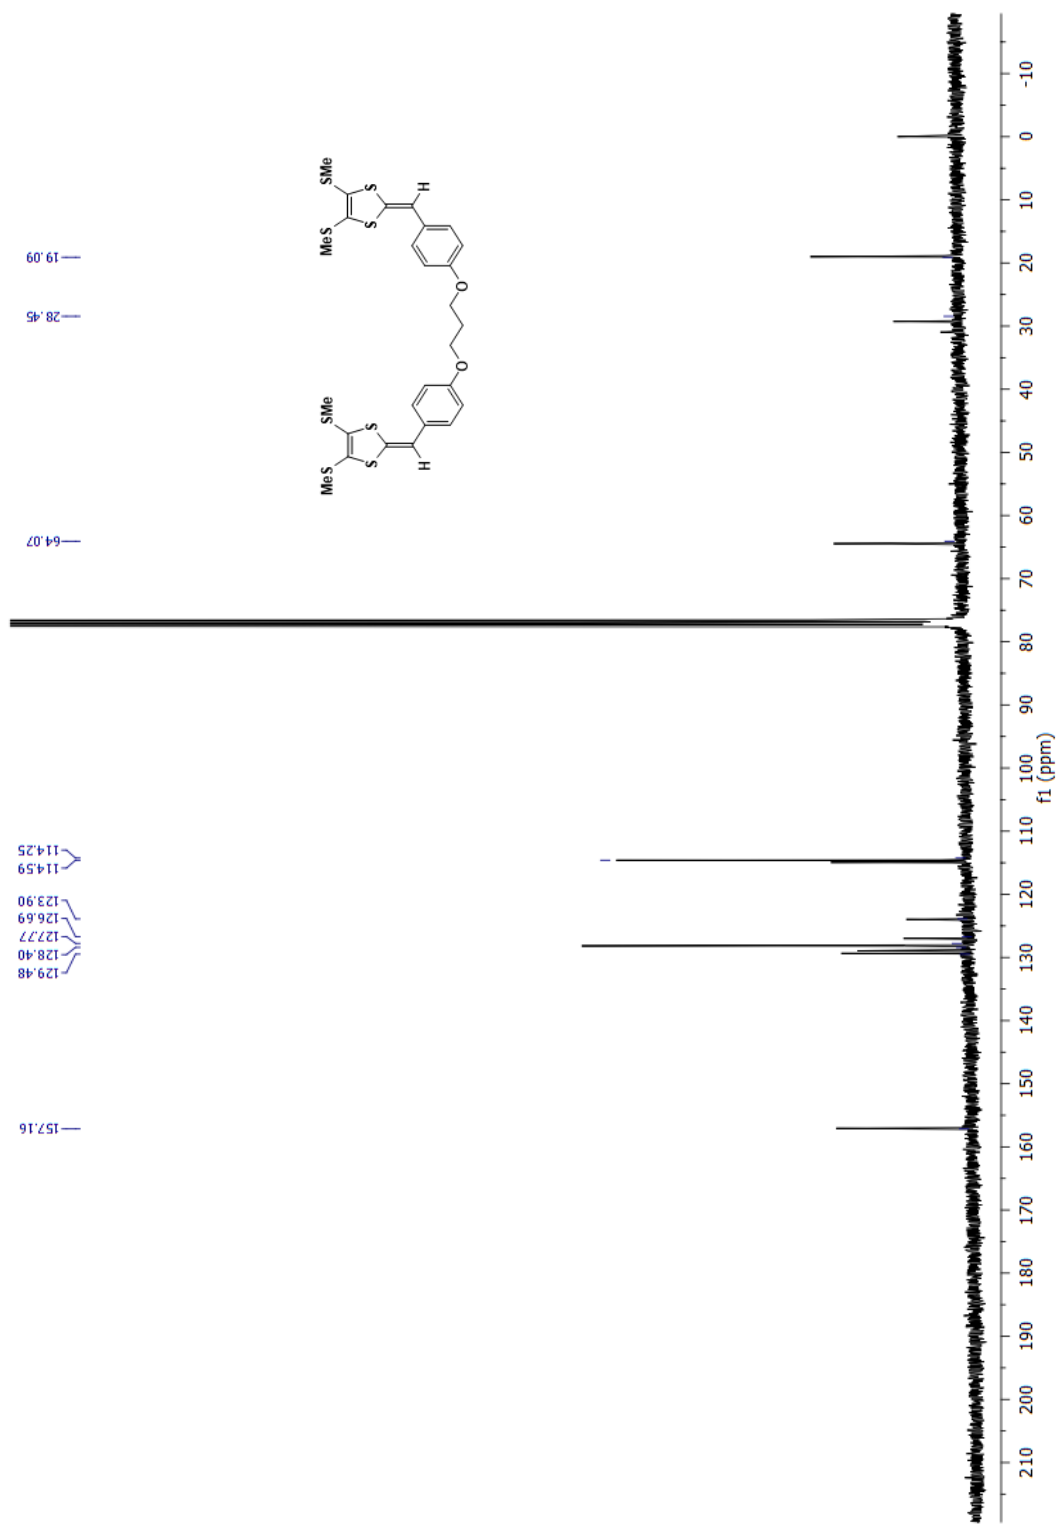

**Fig. S-2** <sup>13</sup>C NMR (75 MHz, CDCl<sub>3</sub>) of compound **5**

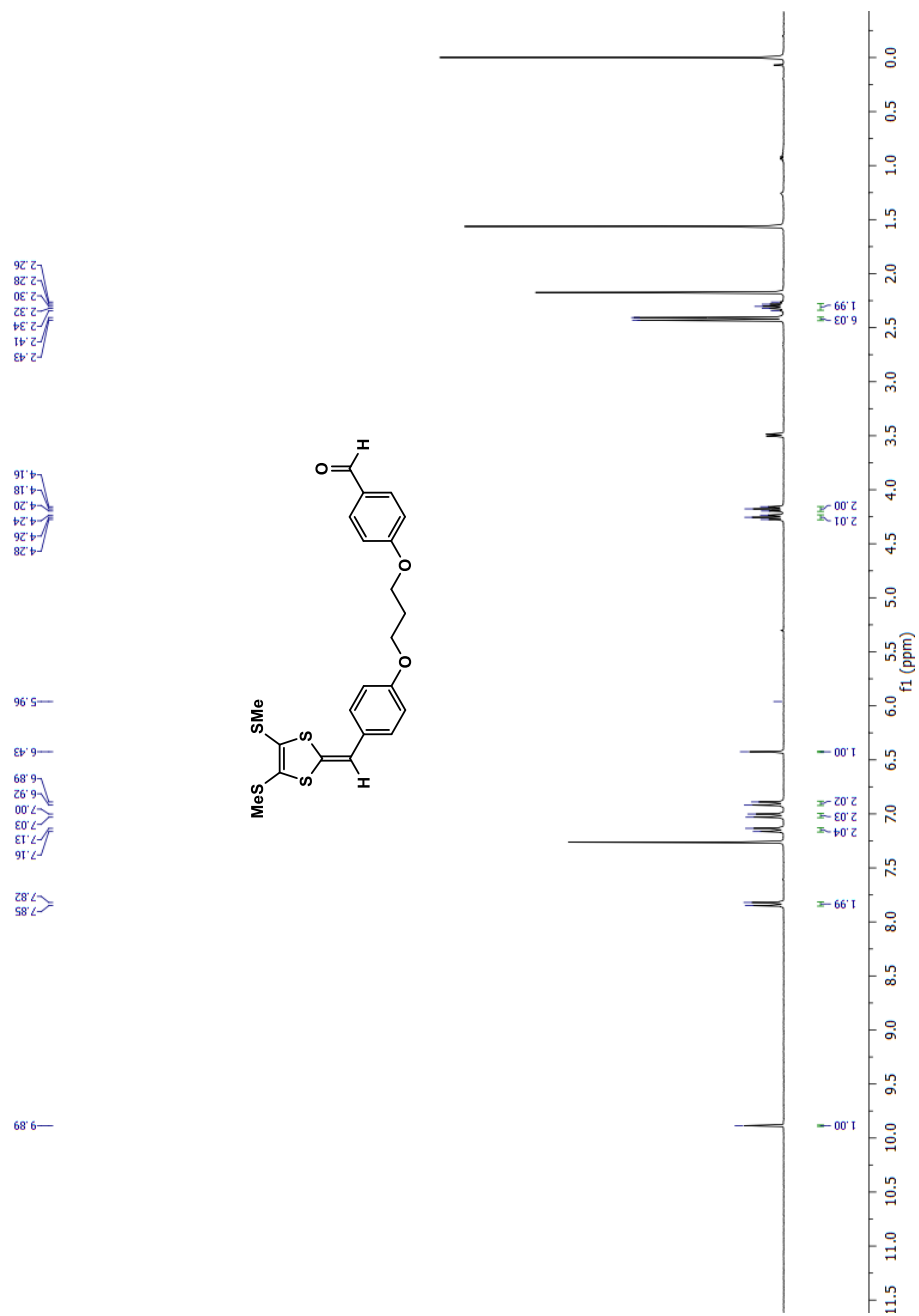

**Fig. S-3** <sup>1</sup>H NMR (500 MHz, CDCl<sub>3</sub>) of compound **6**.

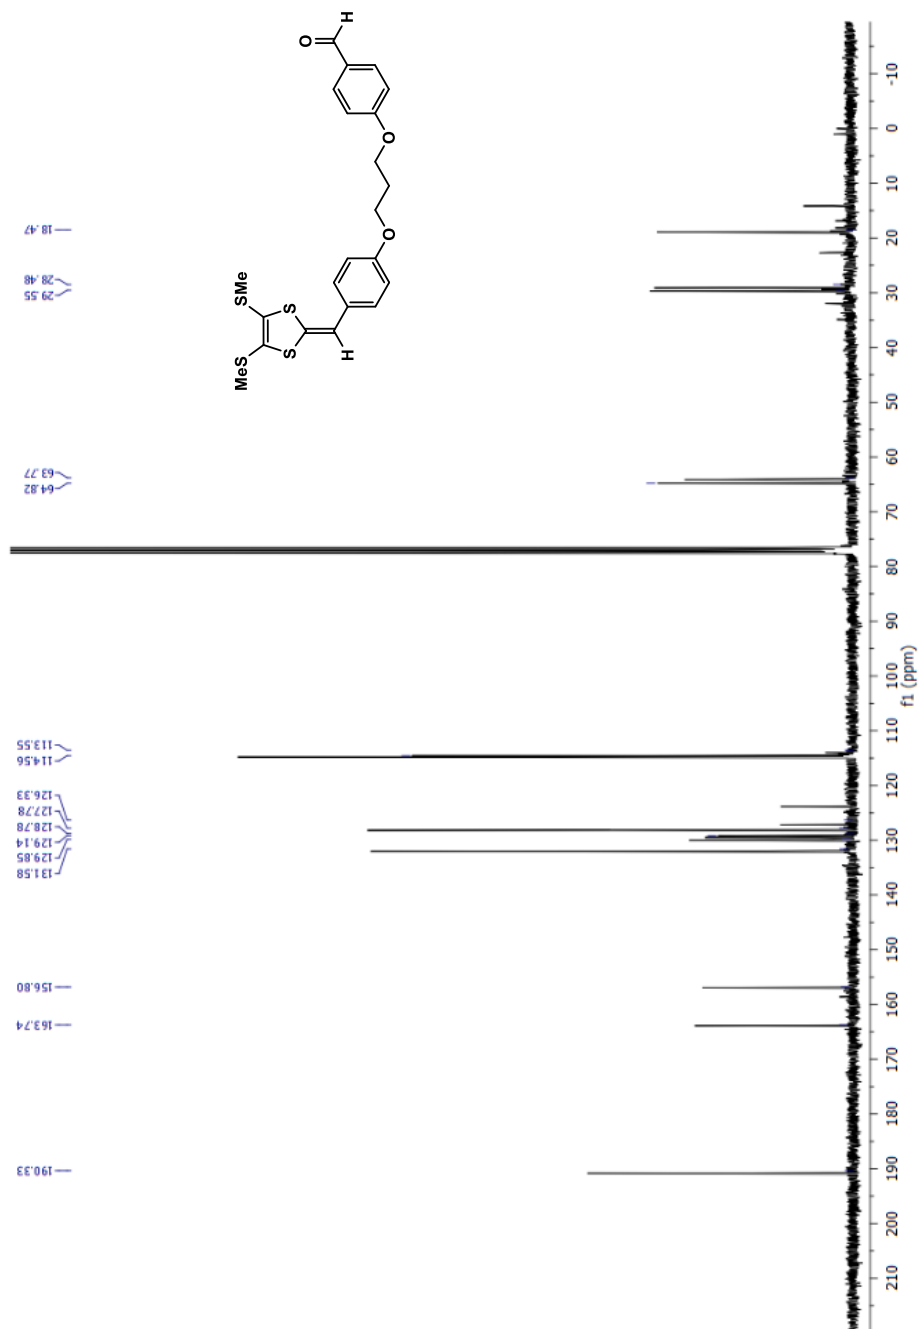

**Fig. S-4**  $^{13}\text{C}$  NMR (75 MHz,  $\text{CDCl}_3$ ) of compound 6

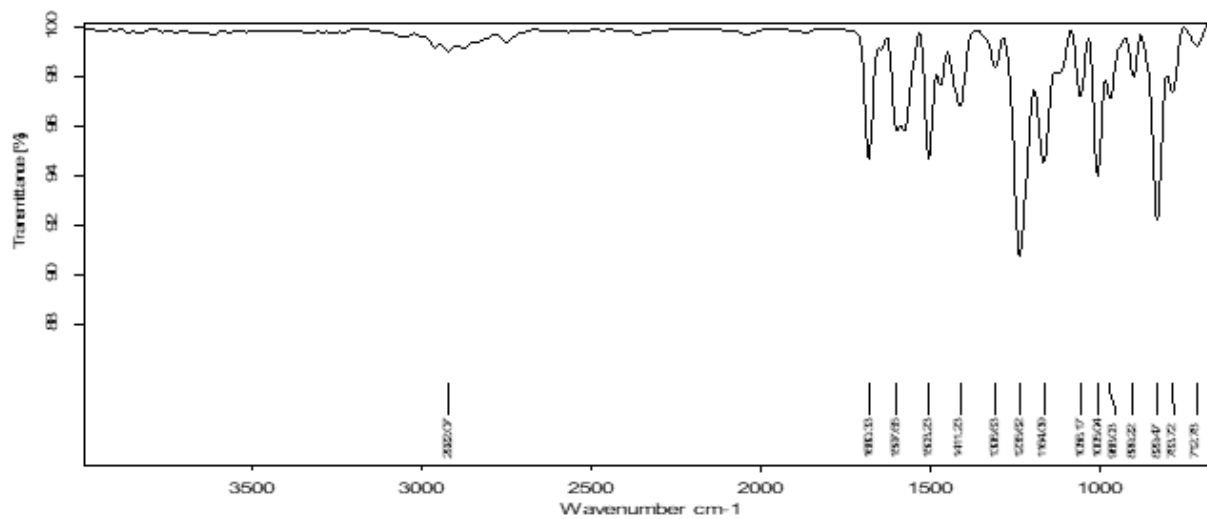

**Fig. S-5** IR spectrum of compound **5**.

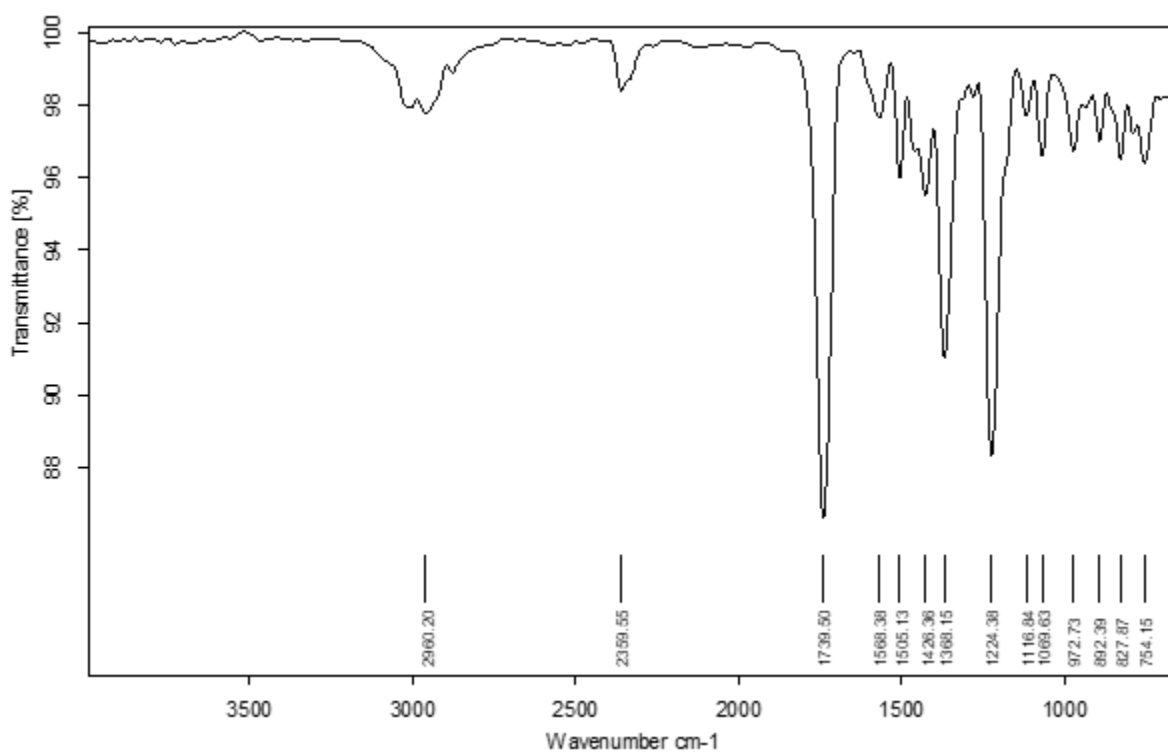

**Fig. S-6** IR spectrum of compound **6**.

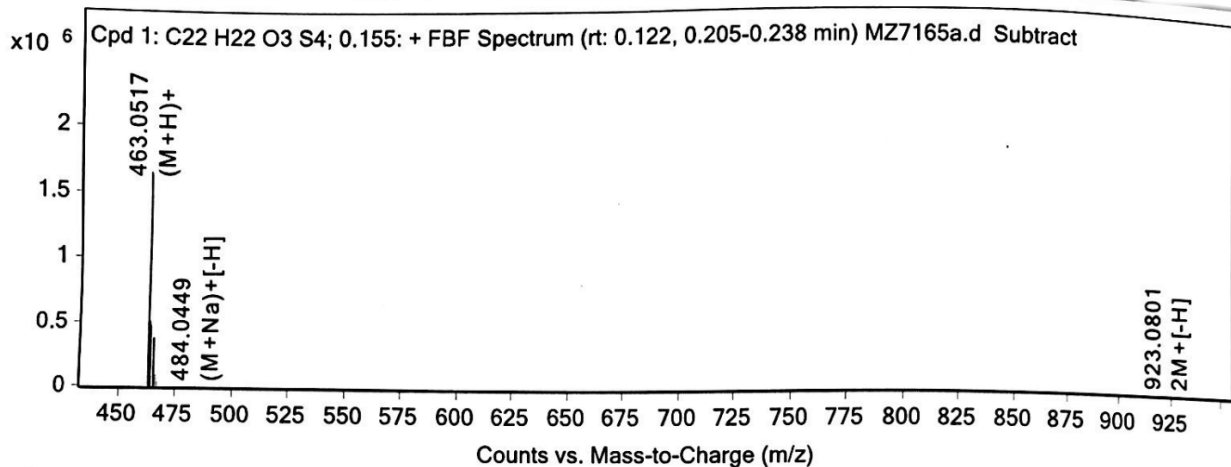

**Fig. S-7** Mass spectrum (APPI) of compound **5**.

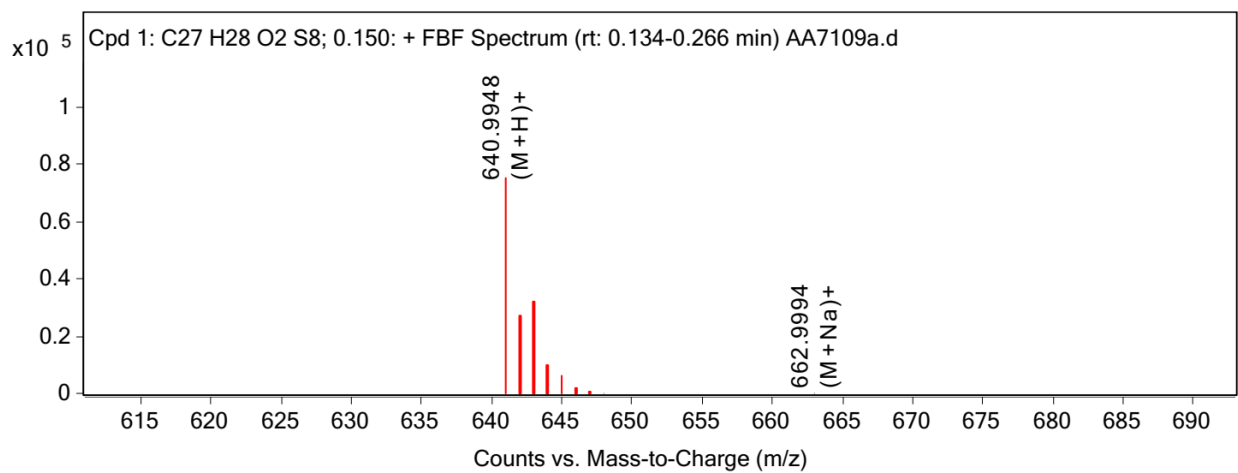

**Fig. S-8** Mass spectrum (APPI) of compound **6**.

## 2. Crystallographic Data for Compounds **5** and **6**

**Table S-1** Crystal data and structure refinement for **5**

|                                                              |                                                                 |
|--------------------------------------------------------------|-----------------------------------------------------------------|
| Empirical formula                                            | C <sub>27</sub> H <sub>28</sub> O <sub>2</sub> S <sub>8</sub>   |
| Formula weight                                               | 640.97                                                          |
| Temperature/K                                                | 100(2)                                                          |
| Crystal system                                               | monoclinic                                                      |
| Space group                                                  | <i>P2/c</i>                                                     |
| <i>a</i> /Å                                                  | 21.3010(5)                                                      |
| <i>b</i> /Å                                                  | 5.21057(12)                                                     |
| <i>c</i> /Å                                                  | 13.0620(3)                                                      |
| $\beta$ /°                                                   | 98.392(2)                                                       |
| Volume/Å <sup>3</sup>                                        | 1434.23(6)                                                      |
| <i>Z</i>                                                     | 2                                                               |
| $\rho_{\text{calc}}$ /mm <sup>3</sup>                        | 1.484                                                           |
| $\mu$ /mm <sup>-1</sup>                                      | 5.970                                                           |
| <i>F</i> (000)                                               | 668.0                                                           |
| Crystal size/mm <sup>3</sup>                                 | 0.232 × 0.179 × 0.039                                           |
| 2 $\theta$ range for data collection                         | 4.194 to 154.824°                                               |
| Index ranges                                                 | -26 ≤ <i>h</i> ≤ 26, -5 ≤ <i>k</i> ≤ 6, -16 ≤ <i>l</i> ≤ 15     |
| Reflections collected                                        | 18250                                                           |
| Independent reflections                                      | 3013 [ <i>R</i> (int) = 0.0745]                                 |
| Data/restraints/parameters                                   | 3013/0/170                                                      |
| Goodness-of-fit on <i>F</i> <sup>2</sup>                     | 1.102                                                           |
| Final <i>R</i> indexes [ <i>I</i> ≥ 2 $\sigma$ ( <i>I</i> )] | <i>R</i> <sub>1</sub> = 0.0631, <i>wR</i> <sub>2</sub> = 0.1733 |
| Final <i>R</i> indexes [all data]                            | <i>R</i> <sub>1</sub> = 0.0658, <i>wR</i> <sub>2</sub> = 0.1752 |
| Largest diff. peak/hole / e Å <sup>-3</sup>                  | 1.11/-0.58                                                      |



**Table S-2** Crystal data and structure refinement for **6**

---

|                                                              |                                                                 |
|--------------------------------------------------------------|-----------------------------------------------------------------|
| Identification code                                          | A21C1_twin1_hklf4                                               |
| Empirical formula                                            | C <sub>22</sub> H <sub>22</sub> O <sub>3</sub> S <sub>4</sub>   |
| Formula weight                                               | 462.63                                                          |
| Temperature/K                                                | 100(2)                                                          |
| Crystal system                                               | triclinic                                                       |
| Space group                                                  | <i>P</i> -1                                                     |
| <i>a</i> /Å                                                  | 12.7578(2)                                                      |
| <i>b</i> /Å                                                  | 13.5031(2)                                                      |
| <i>c</i> /Å                                                  | 15.2145(2)                                                      |
| $\alpha$ /°                                                  | 93.6610(10)                                                     |
| $\beta$ /°                                                   | 114.2170(10)                                                    |
| $\gamma$ /°                                                  | 113.636(2)                                                      |
| Volume/Å <sup>3</sup>                                        | 2106.47(6)                                                      |
| <i>Z</i>                                                     | 4                                                               |
| $\rho_{\text{calc}}/\text{cm}^3$                             | 1.459                                                           |
| $\mu/\text{mm}^{-1}$                                         | 4.327                                                           |
| <i>F</i> (000)                                               | 968.0                                                           |
| Crystal size/mm <sup>3</sup>                                 | 0.124 × 0.101 × 0.048                                           |
| Radiation                                                    | Cu <i>K</i> $\alpha$ ( $\lambda$ = 1.54184)                     |
| 2 $\theta$ range for data collection/°                       | 6.622 to 155.13                                                 |
| Index ranges                                                 | -16 ≤ <i>h</i> ≤ 16, -17 ≤ <i>k</i> ≤ 17, -19 ≤ <i>l</i> ≤ 19   |
| Reflections collected                                        | 20864                                                           |
| Independent reflections                                      | 20864 [ <i>R</i> <sub>sigma</sub> = 0.0307]                     |
| Data/restraints/parameters                                   | 20864/0/529                                                     |
| Goodness-of-fit on <i>F</i> <sup>2</sup>                     | 1.033                                                           |
| Final <i>R</i> indexes [ <i>I</i> ≥ 2 $\sigma$ ( <i>I</i> )] | <i>R</i> <sub>1</sub> = 0.0769, <i>wR</i> <sub>2</sub> = 0.2380 |
| Final <i>R</i> indexes [all data]                            | <i>R</i> <sub>1</sub> = 0.0969, <i>wR</i> <sub>2</sub> = 0.2536 |
| Largest diff. peak/hole / e Å <sup>-3</sup>                  | 0.92/-0.95                                                      |

---

### 3. CV Titration Results of poly-[5]/poly-[7] Film with Phenol and Catechol

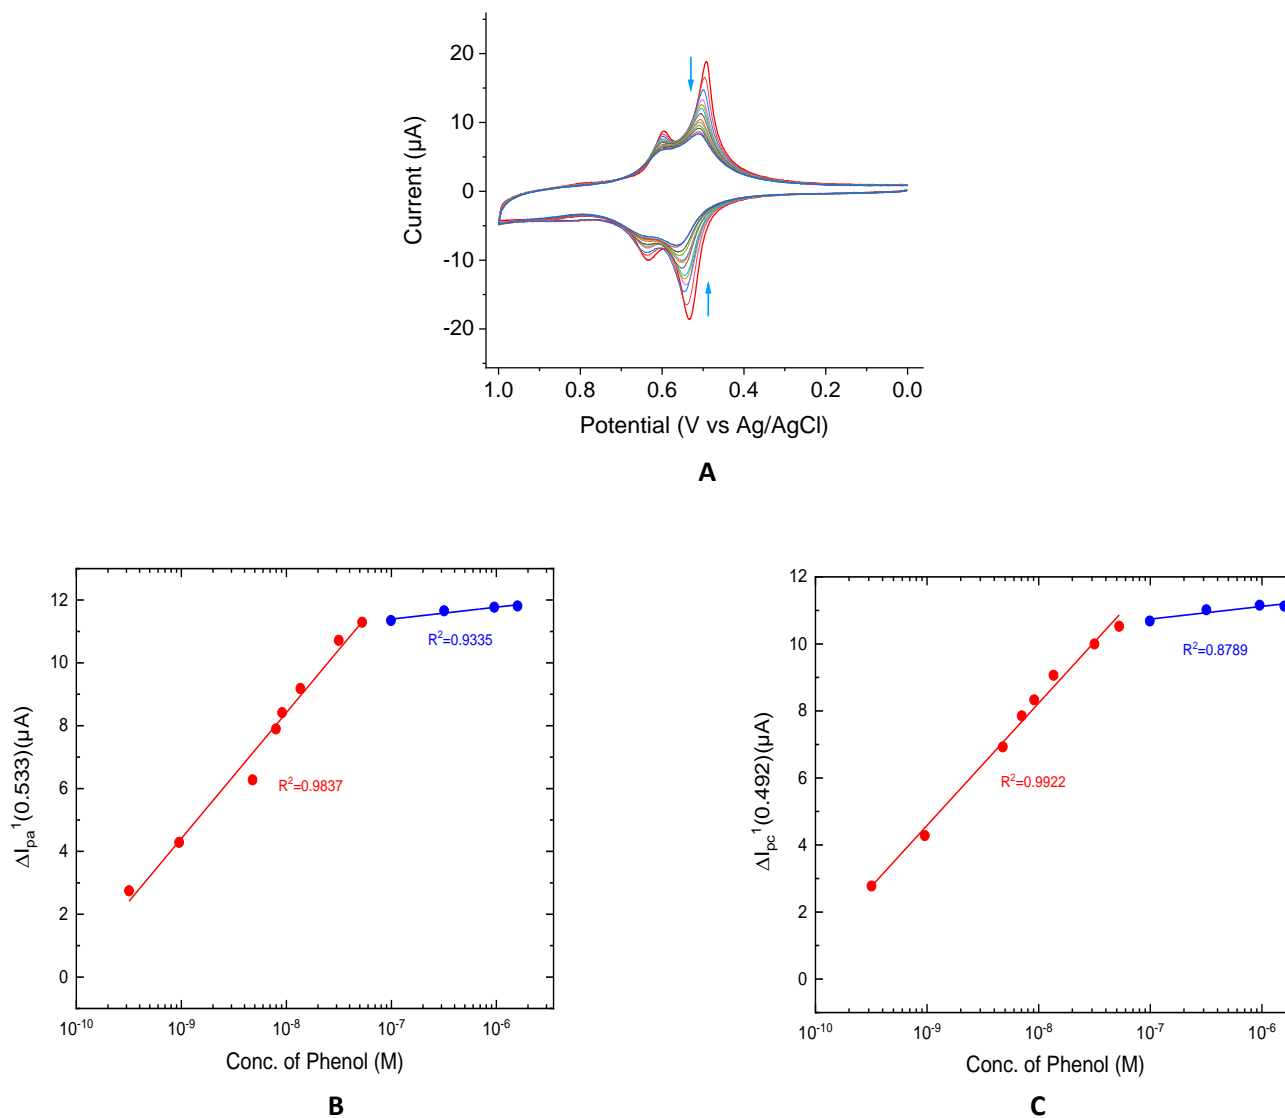

**Fig. S-9** (A) CV scans monitoring the responses of the poly-[5]/poly-[7] thin film to the titration of phenol (0 to  $1.59 \times 10^{-6}$  M) in  $\text{CH}_3\text{CN}$  with  $\text{Bu}_4\text{NBF}_4$  (0.1 M) as the electrolyte. Scan rate = 100 mV/s. (B) Correlation of the change in the intensity of the first anodic peak with the concentration of phenol. (C) Correlation of the change in the intensity of the first cathodic peak with the concentration of phenol.

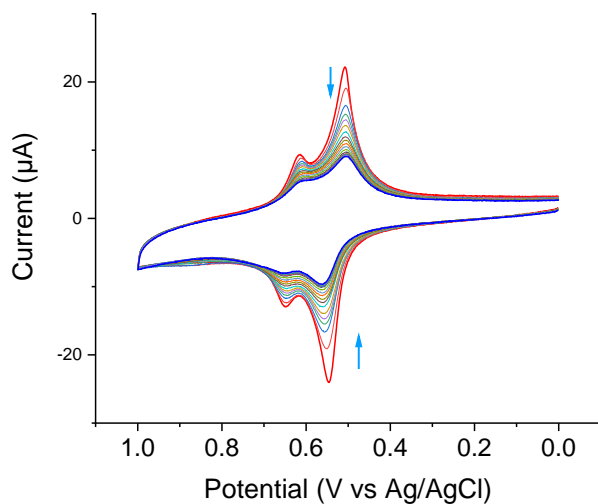

**A**

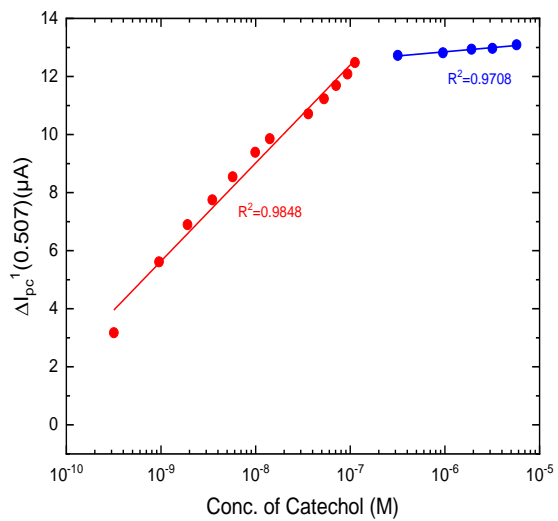

**B**

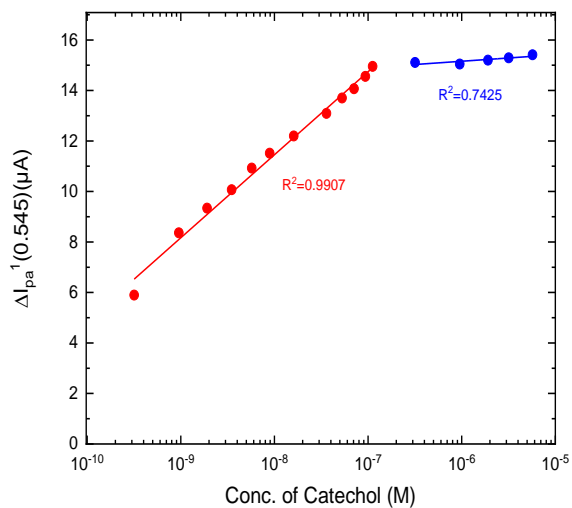

**C**

**Fig. S-10** (A) CV scans monitoring the responses of the poly-[5]/poly-[7] thin film to the titration of catechol (0 to  $5.72 \times 10^{-6}$  M) in  $\text{CH}_3\text{CN}$  with  $\text{Bu}_4\text{NBF}_4$  (0.1 M) as the electrolyte. Scan rate = 100 mV/s. (B) Correlation of the change in the intensity of the first anodic peak with the concentration of catechol. (C) Correlation of the change in the intensity of the first cathodic peak with the concentration of catechol.

#### 4. CV Titration Results of poly-[7] Film with Cannabidiol, Phenol, and Catechol

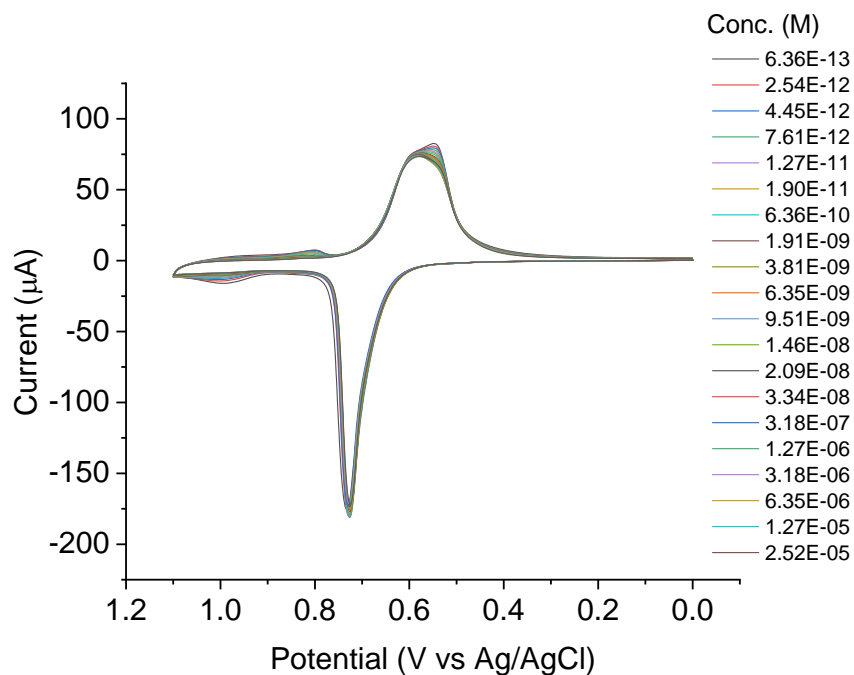

**Fig. S-11** CV scans monitoring the responses of the poly-[7] thin film to the titration of cannabidiol (0 to  $2.52 \times 10^{-5}$  M) in  $\text{CH}_3\text{CN}$  with  $\text{Bu}_4\text{NBF}_4$  (0.1 M) as the electrolyte. Scan rate = 100 mV/s.

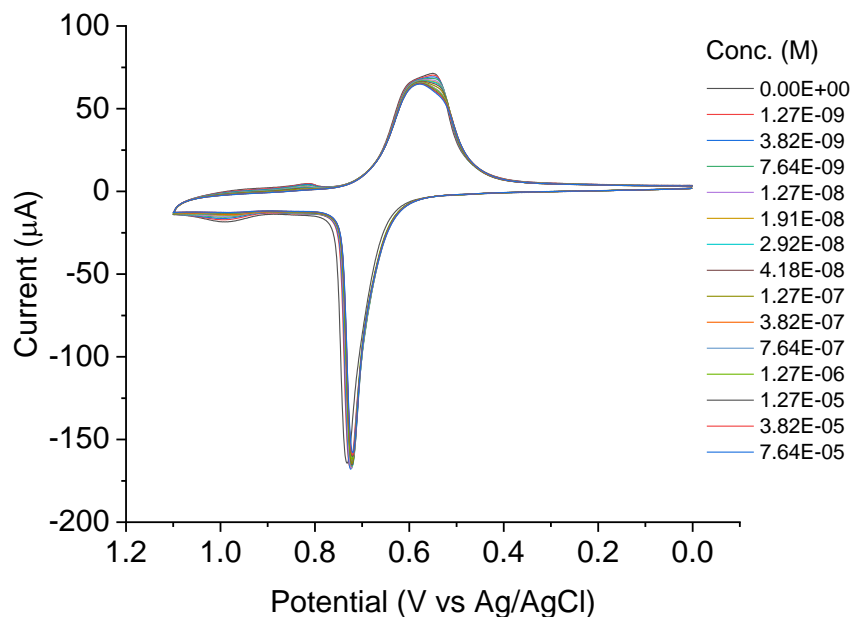

**Fig. S-12** CV scans monitoring the responses of the poly-[7] thin film to the titration of phenol (0 to  $7.64 \times 10^{-5}$  M) in  $\text{CH}_3\text{CN}$  with  $\text{Bu}_4\text{NBF}_4$  (0.1 M) as the electrolyte. Scan rate = 100 mV/s.

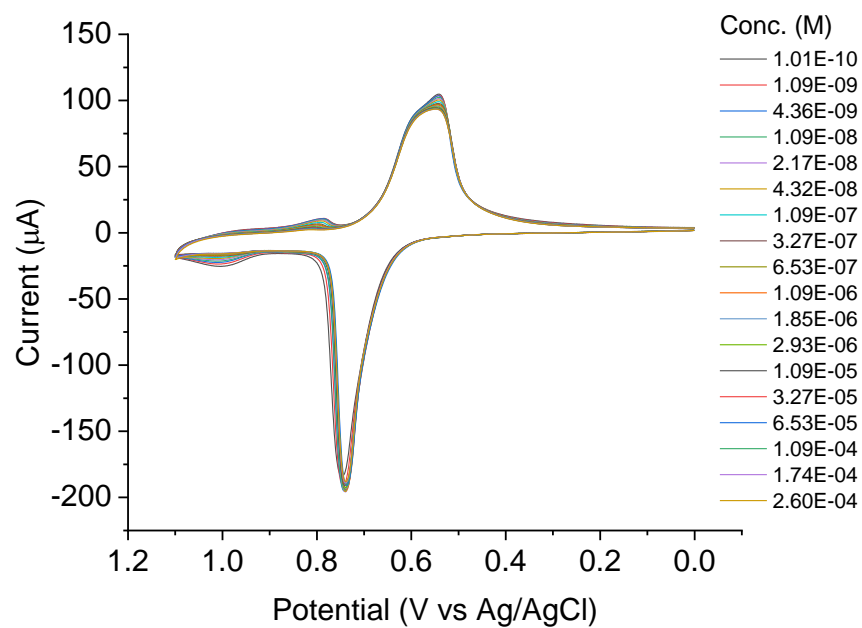

**Fig. S-13** CV scans monitoring the responses of the poly-[7] thin film to the titration of catechol (0 to  $2.60 \times 10^{-4}$  M) in  $\text{CH}_3\text{CN}$  with  $\text{Bu}_4\text{NBF}_4$  (0.1 M) as the electrolyte. Scan rate = 100 mV/s.

## 5. Effects of Trace Amounts of Water on the CV Properties of Poly-[5]//Poly-[7] Film

To investigate whether trace amounts of water in organic solvents can exert significant effects of the CV behavior of the poly-[5]//poly-[7] film, a comparative study was conducted in which two thin films of poly-[5]//poly-[7] were prepared through multi-cycle CV scans. Figure S-14A shows the CV profiles of the thin film prepared and measured in ACS grade CH<sub>3</sub>CN (water < 0.03% wt) without any further purification. Figure S-14B shows the CV profiles of the thin film prepared and measured in ACS grade CH<sub>3</sub>CN dried through a solvent purification system. Comparison of the data from the two sets of experiments confirms that trace amounts of water in organic solvents have rather insignificant effects on the CV properties of the poly-[5]//poly-[7] film.

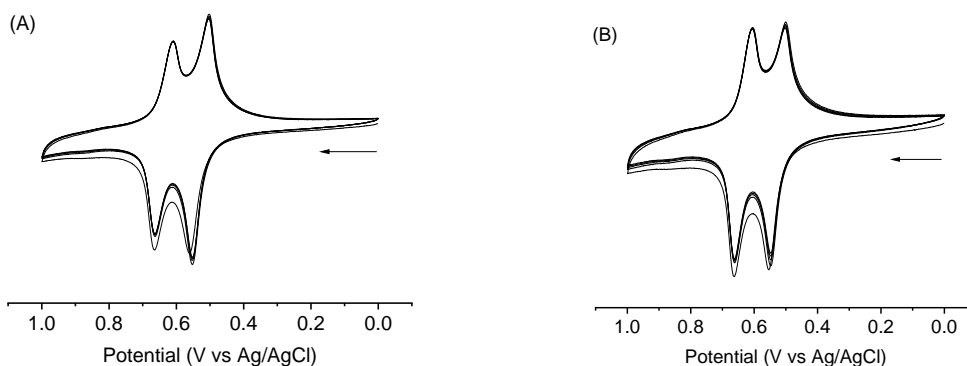

**Figure S-14** (A) Multi-cycle CV scans of poly-[5]//poly-[7] prepared and measured in ACS grade acetonitrile without further drying. (B) Multi CV scans of poly-[5]//poly-[7] prepared and measured in ACS grade acetonitrile after drying through a solvent purification system. Bu<sub>4</sub>NBF<sub>4</sub> (0.1 M) as the electrolyte. Scan rate = 100 mV/s. The arrows indicate the initial scan directions.

## 6. Understanding the Adsorption of Phenols on Poly-[5]//Poly-[7] Film

To shed light on the adsorption process of phenols on the film of poly-[5]//poly-[7] film, a control experiment was undertaken as follows. A poly-[5]//poly-[7] film was first prepared and then immersed into a solution of phenol ( $6.30 \times 10^{-4}$  M) in  $\text{CH}_3\text{CN}$  for a certain period of time. Next, the thin film was subjected to thorough rinsing with  $\text{CH}_2\text{Cl}_2$ . After that, the thin film was examined by CV scans in  $\text{CH}_3\text{CN}$  in the presence of  $\text{Bu}_4\text{NBF}_4$ .

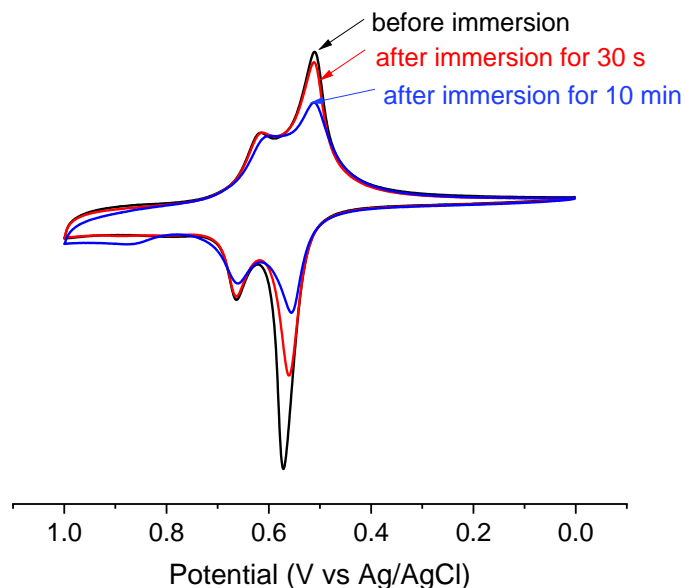

**Figure S-15** CV profiles of a poly-[5]//poly-[7] film measured before and after immersion in a phenol solution ( $6.30 \times 10^{-4}$  M in  $\text{CH}_3\text{CN}$ ) followed by thorough rinsing with  $\text{CH}_2\text{CH}_2$ .  $\text{Bu}_4\text{NBF}_4$  (0.1 M) as the electrolyte. Scan rate = 100 mV/s.

As shown in Figure S-15, the thin film after immersion in a phenol solution followed by thorough  $\text{CH}_2\text{Cl}_2$  rinsing shows attenuated redox currents and slightly shifted redox potentials. The results confirm that phenols can be irreversibly trapped in neutral poly-[5]//poly-[7] film.

## 7. Results of DFT and TD-DFT Calculations

**Table S-3** Summary of TD-DFT results for **5** calculated at the B3LYP/6-311+G(2d,p) level (in CH<sub>2</sub>Cl<sub>2</sub>)

| $\lambda_{\text{abx}}$ (nm) | $f$   | Major contributions                                                                    |
|-----------------------------|-------|----------------------------------------------------------------------------------------|
| 385.2                       | 0.047 | H-1→L (50%), H→L (48%)                                                                 |
| 382.5                       | 0.090 | H-1→L+1 (46%), H→L+1 (51%)                                                             |
| 370.0                       | 0.233 | H-1→L+3 (21%), H-1→L+4 (14%), H→L+3 (21%), H→L+4 (18%)                                 |
| 368.4                       | 0.163 | H-1→L+2 (21%), H-1→L+5 (15%), H→L+2 (18%), H→L+5 (19%)                                 |
| 339.4                       | 0.005 | H-1→L+1 (50%), H→L+1 (47%)                                                             |
| 337.5                       | 0.796 | H-1→L+5 (17%), H→L+2 (16%), H→L+3 (10%), H→L+4 (16%), H→L+5 (11%)                      |
| 333.8                       | 0.533 | H-1→L+4 (15%), H→L+2 (14%), H→L+3 (17%), H→L+4 (10%), H→L+5 (14%)                      |
| 332.4                       | 0.007 | H-1→L+2 (56%), H→L+2 (43%)                                                             |
| 330.6                       | 0.002 | H-1→L+3 (55%), H→L+3 (43%)                                                             |
| 310.9                       | 0.027 | H-1→L+6 (41%), H→L+6 (36%)                                                             |
| 310.3                       | 0.028 | H-1→L+7 (38%), H→L+6 (10%), H→L+7 (38%)                                                |
| 289.9                       | 0.013 | H-4→L (89%)                                                                            |
| 289.7                       | 0.016 | H-5→L+1 (62%), H-2→L+1 (21%)                                                           |
| 281.0                       | 0.011 | H-1→L+8 (29%), H-1→L+11 (11%), H→L+8 (28%), H→L+11 (10%)                               |
| 279.0                       | 0.007 | H-1→L+10 (25%), H-1→L+11 (14%), H→L+10 (27%), H→L+11 (16%)                             |
| 276.6                       | 0.022 | H-1→L+9 (37%), H→L+9 (39%)                                                             |
| 276.5                       | 0.049 | H-6→L (35%), H-3→L (51%)                                                               |
| 274.8                       | 0.039 | H-7→L+1 (24%), H-5→L+1 (12%), H-2→L+1 (45%)                                            |
| 273.9                       | 0.011 | H-1→L+8 (12%), H-1→L+10 (15%), H-1→L+11 (17%), H→L+8 (11%), H→L+10 (14%), H→L+11 (17%) |
| 263.9                       | 0.115 | H-2→L+3 (70%)                                                                          |
| 259.7                       | 0.140 | H-3→L+2 (67%)                                                                          |
| 259.5                       | 0.029 | H-1→L+18 (11%), H→L+10 (11%), H→L+12 (16%), H→L+18 (10%)                               |
| 258.9                       | 0.014 | H-1→L+13 (10%), H-1→L+16 (14%), H→L+13 (12%), H→L+16 (12%)                             |
| 258.2                       | 0.006 | H-1→L+12 (22%), H→L+12 (22%)                                                           |
| 256.8                       | 0.011 | H-1→L+12 (11%), H-1→L+18 (18%), H→L+18 (17%)                                           |

**Table S-4** Summary of TD-DFT results for **6** calculated at the B3LYP/6-311+G(2d,p) level (in CH<sub>2</sub>Cl<sub>2</sub>)

| $\lambda_{\text{abx}}$ (nm) | $f$   | Major contributions      |
|-----------------------------|-------|--------------------------|
| 383.7                       | 0.048 | H→L+1 (98%)              |
| 368.0                       | 0.227 | H→L+2 (51%), H→L+4 (40%) |
| 336.1                       | 0.699 | H→L+2 (46%), H→L+4 (50%) |
| 311.6                       | 0.031 | H→L+5 (88%)              |
| 290.1                       | 0.013 | H-2→L+1 (94%)            |
| 280.3                       | 0.018 | H→L+6 (64%), H→L+7 (21%) |



|       |       |                                                                       |
|-------|-------|-----------------------------------------------------------------------|
| 279.6 | 0.087 | H-1→L (90%)                                                           |
| 276.8 | 0.507 | H-3→L (82%)                                                           |
| 276.5 | 0.047 | H-4→L+1 (35%), H-1→L+1 (50%)                                          |
| 273.1 | 0.009 | H→L+6 (29%), H→L+7 (55%)                                              |
| 262.9 | 0.014 | H-7→L (68%), H-3→L+3 (29%)                                            |
| 259.2 | 0.137 | H-1→L+2 (73%)                                                         |
| 256.7 | 0.028 | H-2→L+2 (57%), H→L+8 (15%)                                            |
| 256.5 | 0.009 | H-2→L+2 (13%), H→L+8 (18%), H→L+10 (15%), H→L+13 (40%)                |
| 251.4 | 0.005 | H-4→L+1 (29%), H-1→L+1 (13%), H→L+11 (30%)                            |
| 250.3 | 0.004 | H→L+8 (12%), H→L+10 (19%), H→L+11 (14%), H→L+12 (14%)                 |
| 249.8 | 0.050 | H-4→L+1 (17%), H-1→L+1 (16%), H→L+9 (18%), H→L+11 (14%), H→L+12 (12%) |
| 243.9 | 0.027 | H-2→L+4 (10%), H-1→L+4 (61%)                                          |
| 241.4 | 0.037 | H-4→L+2 (32%), H-2→L+4 (13%), H→L+16 (17%)                            |
| 241.0 | 0.015 | H-5→L+2 (11%), H-2→L+4 (51%)                                          |
| 239.4 | 0.001 | H-3→L+1 (96%)                                                         |
| 238.3 | 0.014 | H→L+9 (23%), H→L+12 (26%), H→L+17 (15%)                               |

**Table S-5** Cartesian coordinates for optimized **5** and **6** at the B3LYP/6-311+G(2d,p) level (in CH<sub>2</sub>Cl<sub>2</sub>)

| <b>5</b> ( $E = -4382.208480$ Hartree) |             |            |             | <b>6</b> ( $E = -2670.414334$ Hartree) |              |             |             |
|----------------------------------------|-------------|------------|-------------|----------------------------------------|--------------|-------------|-------------|
| H                                      | -3.48526500 | 2.83003500 | 1.94723600  | H                                      | 0.15509700   | 1.75874400  | -1.30890300 |
| C                                      | -3.72557300 | 2.73262500 | 0.89553400  | C                                      | 0.35314600   | 0.78032200  | -0.88851100 |
| C                                      | -4.33892600 | 2.52979500 | -1.79081400 | C                                      | 0.82748000   | -1.73571100 | 0.15078600  |
| C                                      | -2.93003900 | 3.39770300 | -0.04190500 | C                                      | -0.72466100  | -0.00207000 | -0.46548000 |
| C                                      | -4.80805800 | 1.97202000 | 0.48994200  | C                                      | 1.65007600   | 0.30897800  | -0.78502800 |
| C                                      | -5.14168000 | 1.83614600 | -0.87144500 | C                                      | 1.92918000   | -0.96287400 | -0.24869000 |
| C                                      | -3.24947400 | 3.29639300 | -1.39774300 | C                                      | -0.47923900  | -1.27478900 | 0.05354400  |
| H                                      | -5.41019600 | 1.50403600 | 1.25654400  | H                                      | 2.44591300   | 0.93871000  | -1.15830900 |
| H                                      | -2.66430100 | 3.80582900 | -2.15002600 | H                                      | -1.28827700  | -1.91224400 | 0.38087400  |
| H                                      | -4.57149200 | 2.46273800 | -2.84778800 | H                                      | 0.99902400   | -2.72689000 | 0.55552500  |
| O                                      | -1.88906500 | 4.12054900 | 0.45914800  | O                                      | -1.96196100  | 0.55470400  | -0.60932000 |
| C                                      | -1.03171700 | 4.81939300 | -0.45342600 | C                                      | -3.10540200  | -0.20268200 | -0.20398600 |
| H                                      | -0.59827600 | 4.11236100 | -1.16580100 | H                                      | -3.14681400  | -1.13882100 | -0.77073100 |
| H                                      | -1.61372200 | 5.56179100 | -1.00765400 | H                                      | -3.02618100  | -0.44733500 | 0.86048900  |
| C                                      | 0.05492800  | 5.50595800 | 0.35594900  | C                                      | -4.33164000  | 0.65275800  | -0.47570600 |
| H                                      | -0.40784300 | 6.16059500 | 1.09935500  | H                                      | -4.37485700  | 0.89831100  | -1.53933700 |
| H                                      | 0.63351000  | 6.14293900 | -0.31847500 | H                                      | -4.24981600  | 1.59060500  | 0.07860200  |
| C                                      | 0.99446800  | 4.55602000 | 1.07836500  | C                                      | -5.60785300  | -0.06329200 | -0.07035800 |
| H                                      | 1.69057000  | 5.12035600 | 1.70599200  | H                                      | -5.73288700  | -0.99524900 | -0.62980900 |
| H                                      | 0.43478000  | 3.86343800 | 1.71264300  | H                                      | -5.60803700  | -0.29487900 | 0.99900600  |
| O                                      | 1.72781000  | 3.82021900 | 0.08987400  | O                                      | -6.70189800  | 0.81856200  | -0.36661900 |
| C                                      | 2.62391200  | 2.88040000 | 0.50342200  | C                                      | -7.96456600  | 0.41544300  | -0.09955600 |
| C                                      | 4.53899900  | 0.89589300 | 1.14566200  | C                                      | -10.64711900 | -0.21385000 | 0.36925300  |
| C                                      | 3.29281600  | 2.18130300 | -0.50541700 | C                                      | -8.97587000  | 1.33663300  | -0.42693800 |
| C                                      | 2.90116700  | 2.57735400 | 1.83836600  | C                                      | -8.29885200  | -0.82062300 | 0.46285700  |
| C                                      | 3.83940500  | 1.59856000 | 2.13947400  | C                                      | -9.63515200  | -1.12051900 | 0.69043500  |
| C                                      | 4.22645000  | 1.20943300 | -0.19110300 | C                                      | -10.29608800 | 1.02453700  | -0.19522100 |

|   |              |             |             |   |              |             |             |
|---|--------------|-------------|-------------|---|--------------|-------------|-------------|
| H | 3.05975100   | 2.40598400  | -1.53910600 | H | -8.69004600  | 2.28637000  | -0.86130700 |
| H | 2.39663400   | 3.08989900  | 2.64498400  | H | -7.53736900  | -1.54149000 | 0.72175600  |
| H | 4.04029900   | 1.37582100  | 3.18151700  | H | -9.89678500  | -2.07840600 | 1.12689400  |
| H | 4.69014300   | 0.67349700  | -1.00786600 | H | -11.07815200 | 1.73026900  | -0.44596000 |
| C | 5.51631200   | -0.09982700 | 1.56758800  | C | -12.04180500 | -0.57383800 | 0.62735600  |
| H | 5.45422400   | -0.36975600 | 2.61841100  | H | -12.18432300 | -1.57769300 | 1.07290200  |
| C | -6.25059300  | 1.04424400  | -1.38878900 | O | -13.00915900 | 0.13074500  | 0.39262700  |
| H | -6.48706400  | 1.23436900  | -2.43226700 | C | 3.26153700   | -1.53238500 | -0.09008600 |
| C | -7.01171500  | 0.10781900  | -0.78912500 | H | 3.27040500   | -2.59948300 | 0.11501400  |
| S | -8.37104100  | -0.65158300 | -1.65684000 | C | 4.47485600   | -0.94812500 | -0.13712400 |
| S | -6.87129700  | -0.52188200 | 0.86600800  | S | 5.96467400   | -1.91212800 | 0.02359000  |
| C | -8.63180000  | -1.97882100 | -0.51463800 | S | 4.84417400   | 0.77442800  | -0.37377400 |
| C | -7.95626300  | -1.91234700 | 0.64809000  | C | 7.07051200   | -0.55388900 | 0.25648700  |
| S | -9.86498900  | -3.17718800 | -0.90299400 | C | 6.56023100   | 0.67973300  | 0.08691500  |
| S | -8.00227200  | -3.06579600 | 1.98725000  | S | 8.73001200   | -0.98395900 | 0.70326700  |
| C | -9.26256100  | -3.86490600 | -2.49330000 | S | 7.47098600   | 2.18728200  | 0.13737700  |
| H | -9.25129700  | -3.10699600 | -3.27268900 | C | 9.63734200   | -0.71803000 | -0.86894100 |
| H | -9.97981600  | -4.64248100 | -2.75366900 | H | 9.20278400   | -1.32019900 | -1.66356900 |
| H | -8.27607400  | -4.30424000 | -2.36354300 | H | 10.65624100  | -1.05148900 | -0.67315600 |
| C | -9.55042400  | -2.59823400 | 2.85568200  | H | 9.64207300   | 0.33629300  | -1.13524000 |
| H | -9.58842200  | -3.23337200 | 3.74055800  | C | 6.68071800   | 3.07101700  | 1.53851200  |
| H | -9.51601600  | -1.55394500 | 3.15775600  | H | 7.21554000   | 4.01690900  | 1.61727800  |
| H | -10.41674000 | -2.79401400 | 2.22788000  | H | 5.62983500   | 3.26378500  | 1.33676000  |
| C | 6.49014500   | -0.72098900 | 0.87387500  | H | 6.80223000   | 2.50165700  | 2.45724100  |
| S | 6.93456100   | -0.48127400 | -0.83080900 |   |              |             |             |
| S | 7.50938200   | -1.96716500 | 1.63770000  |   |              |             |             |
| C | 8.73454800   | -2.04464200 | 0.36697800  |   |              |             |             |
| C | 8.48198400   | -1.35715800 | -0.76200100 |   |              |             |             |
| S | 10.16777500  | -3.01605900 | 0.74197900  |   |              |             |             |
| S | 9.47342600   | -1.36988400 | -2.21857900 |   |              |             |             |
| C | 9.87285400   | -4.53994900 | -0.23614500 |   |              |             |             |
| H | 10.68797100  | -5.21352300 | 0.02765700  |   |              |             |             |
| H | 9.90641200   | -4.32456000 | -1.30153600 |   |              |             |             |
| H | 8.92289500   | -4.99058600 | 0.04203100  |   |              |             |             |
| C | 9.95859000   | 0.39346600  | -2.37300900 |   |              |             |             |
| H | 10.58438800  | 0.44046000  | -3.26354600 |   |              |             |             |
| H | 10.53312700  | 0.70181900  | -1.50247200 |   |              |             |             |
| H | 9.08662800   | 1.02877500  | -2.50814100 |   |              |             |             |
